# Supplementary material for: Genome-Wide Association Study of Growth and Feeding Traits in Pekin Ducks
Source: Front Genet. 2019 Jul 26;10:702. doi: 10.3389/fgene.2019.00702 (PMC6676418; doi:10.3389/fgene.2019.00702)
Supplement: Table S2 — Functional annotation of candidate genes [file Table_2.xlsx]

## Sheet: Table S1. Annotaion of cadidate
	Protein_Class	GO_MF	GO_CC	GO_BP	Pathway
DNAJC19		enzyme activator activity(GO:0008047);pyrophosphatase activity(GO:0016462);transporter activity(GO:0005215)	cytoplasm(GO:0005737);mitochondrial inner membrane(GO:0005743);protein complex(GO:0043234)	catabolic process(GO:0009056);cellular process(GO:0009987);mitochondrial transport(GO:0006839);mitochondrion organization(GO:0007005);nitrogen compound metabolic process(GO:0006807);protein localization(GO:0008104);protein targeting(GO:0006605);regulation of nucleobase-containing compound metabolic process(GO:0019219);regulation of phosphate metabolic process(GO:0019220)
ATP11A	cation transporter(PC00068);hydrolase(PC00121)	lipid transporter activity(GO:0005319);pyrophosphatase activity(GO:0016462)	cytoplasm(GO:0005737);endoplasmic reticulum(GO:0005783);endosome(GO:0005768);plasma membrane(GO:0005886)	anion transport(GO:0006820);biological regulation(GO:0065007);catabolic process(GO:0009056);cellular component organization(GO:0016043);cellular process(GO:0009987);nitrogen compound metabolic process(GO:0006807);nucleobase-containing compound metabolic process(GO:0006139);phosphate-containing compound metabolic process(GO:0006796)
SLC39A10	transporter(PC00227)	cation transmembrane transporter activity(GO:0008324)	integral to membrane(GO:0016021);plasma membrane(GO:0005886)	cellular process(GO:0009987);homeostatic process(GO:0042592)
SORCS1	receptor(PC00197);transporter(PC00227)	lipid binding(GO:0008289);receptor activity(GO:0004872);transmembrane transporter activity(GO:0022857)		intracellular protein transport(GO:0006886);lipid metabolic process(GO:0006629);lipid transport(GO:0006869);receptor-mediated endocytosis(GO:0006898)
ELK3	nucleic acid binding(PC00171);signaling molecule(PC00207);winged helix/forkhead transcription factor(PC00246)	sequence-specific DNA binding RNA polymerase II transcription factor activity(GO:0000981)	intracellular(GO:0005622);nucleus(GO:0005634)	biosynthetic process(GO:0009058);cell differentiation(GO:0030154);cellular process(GO:0009987);nitrogen compound metabolic process(GO:0006807)	Interleukin signaling pathway->ELK;;
SLC10A2	cation transporter(PC00068)	cation transmembrane transporter activity(GO:0008324);lipid transporter activity(GO:0005319)		anion transport(GO:0006820);cellular process(GO:0009987)
